# Supplementary material for: Bottom-up perspectives on hospital-wide patient flow – A multi-site qualitative study of solutions to organizational paradoxes
Source: Research Square preprint supplement (doi:10.21203/rs.3.rs-6663600/v1), 2025-06-18
Supplement: Supplementary file 1 [file 0aed89280f53d050f353f4d0.pdf]

| Hospital Case | Hospital type  | Hospital setting | Clinic setting | Healthcare profession | Date of interview | Hospital Case | Hospital type  | Hospital setting | Clinic setting | Healthcare profession | Date of interview |
|---------------|----------------|------------------|----------------|-----------------------|-------------------|---------------|----------------|------------------|----------------|-----------------------|-------------------|
| A             | Tertiary care  | Emergency        | ED             | Nurse                 | 2023-05-29        | D             | Secondary care | Medicine         | Clinic         | Physician             | 2023-05-16        |
|               |                | Surgery          | Clinic         | Physician             | 2023-06-06        |               |                | Surgery          | Ward           | Nurse                 | 2023-05-31        |
|               |                | Medicine         | Clinic         | Physician             | 2023-08-28        |               |                | Emergency        | ED             | Nurse                 | 2023-09-12        |
|               |                | Surgery          | Ward           | Nurse                 | 2023-09-07        |               |                | Medicine         | Ward           | Nurse                 | 2023-09-15        |
|               |                | Emergency        | ED             | Physician             | 2023-10-03        |               |                | Surgery          | Clinic         | Physician             | 2023-10-11        |
| B             | Tertiary care  | Medicine         | Clinic         | Physician             | 2023-05-15        | E             | Secondary care | Emergency        | ED             | Nurse                 | 2023-05-24        |
|               |                | Surgery          | OR             | Nurse                 | 2023-08-30        |               |                | Surgery          | Clinic         | Physician             | 2023-08-24        |
|               |                | Emergency        | ED             | Physician             | 2023-08-31        |               |                | Medicine         | Clinic         | Physician             | 2023-08-25        |
|               |                | Medicine         | Ward           | Nurse                 | 2023-10-05        |               |                | Emergency        | ED             | Physician             | 2023-09-04        |
|               |                | Surgery          | Clinic         | Physician             | 2023-10-05        |               |                | Medicine         | Ward           | Nurse                 | 2023-09-06        |
| C             | Secondary care | Surgery          | Clinic         | Physician             | 2023-06-05        | F             | Tertiary care  | Medicine         | Ward           | Nurse                 | 2023-05-10        |
|               |                | Surgery          | Ward           | Nurse                 | 2023-06-07        |               |                | Surgery          | Clinic         | Physician             | 2023-06-05        |
|               |                | Emergency        | ED             | Physician             | 2023-06-08        |               |                | Emergency        | ED             | Nurse                 | 2023-08-31        |
|               |                | Medicine         | Ward           | Nurse                 | 2023-08-19        |               |                | Medicine         | Ward           | Nurse                 | 2023-10-26        |
|               |                | Emergency        | ED             | Nurse                 | 2023-10-17        |               |                | Emergency        | ED             | Physician             | 2023-10-26        |
