# Supplementary material for: Bottom-up perspectives on hospital-wide patient flow – A multi-site qualitative study of solutions to organizational paradoxes
Source: Research Square preprint supplement (doi:10.21203/rs.3.rs-6663600/v1), 2025-06-18
Supplement: Supplementary file 3 [file 81d1c467dba8d7a930aca309.pdf]

| Paradox                                                                          | Latent tension                                                                                    | Salient tension                                                                    | Rendering factor                    |
|----------------------------------------------------------------------------------|---------------------------------------------------------------------------------------------------|------------------------------------------------------------------------------------|-------------------------------------|
| <b>1</b> <i>System-wide patient trajectories but local patient focus</i>         | Collaborative issues<br>Unclear operational priorities<br>Ambiguous flow objectives               | Overcrowding<br>Clinic expansions                                                  | Scarcity<br>(Change)<br>(Plurality) |
| <b>2</b> <i>Advocating for less rigidity, but specialization builds rigidity</i> | Scheduling challenges<br>Slow patient transfer<br>Operational inflexibility                       | Overcrowding<br>Multimorbid patients<br>Lack of OR capacity                        | Scarcity<br>(Plurality)             |
| <b>3</b> <i>Mandate with doctors, but flow understanding with nurses</i>         | Congestion consequence unawareness<br>Needing coordinating assistance<br>Slow patient progression | Overcrowding<br>Long LoS patients<br>Unmet discharge planning                      | Scarcity<br>Change                  |
| <b>4</b> <i>Seeking workflow control, receiving workflow disorder</i>            | Stressed doctors<br>Needing coordinating assistance<br>Deprioritization of flow                   | Overcrowding<br>Unmet discharge planning<br>Long LoS patients                      | Scarcity                            |
| <b>5</b> <i>Seeking routine compliance, receiving routine negligence</i>         | Altered treatment plans<br>Lack of long-term planning<br>Unpredictable work days                  | OR schedule overshooting<br>Incomprehensible decisions<br>Overcrowding             | Plurality<br>Change<br>(Scarcity)   |
| <b>6</b> <i>Believing in proactivity, receiving reactivity</i>                   | Short planning horizon<br>Little proactive planning<br>Stressful last-minute actions              | Long LoS patients<br>Unmet discharge planning<br>Foreseeable avoidable bottlenecks | Change<br>Scarcity                  |
| <b>7</b> <i>Emphasizing statistical feedback, only not for flow</i>              | Low flow performance feed-back<br>Unmotivating metrics<br>Lack of best practice comparison        | New productivity requirements<br>Unsatisfying performance                          | Change                              |
